# Supplementary material for: Molecular analysis of high-grade serous ovarian carcinoma with and without associated serous tubal intra-epithelial carcinoma
Source: PubMed Central journal article supplement (PMC5645359; doi:10.1038/s41467-017-01217-9), 2017-10-17
Supplement: 41467_2017_1217_MOESM1_ESM.pdf [file 41467_2017_1217_MOESM1_ESM.pdf]

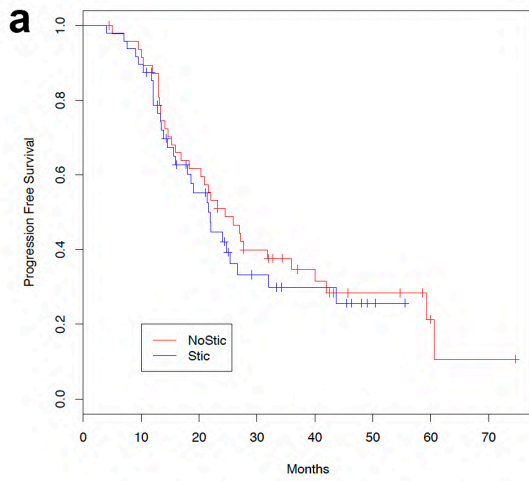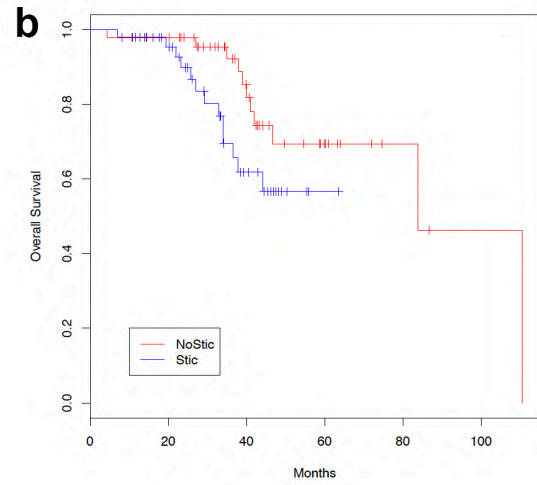

**Supplementary Figure 1.** Clinical outcome by STIC status. Progression-free (a;  $p = 0.56$ , log-rank test) or overall (b;  $p=0.084$ , log-rank test) survival are shown for patients with or without STIC lesions.

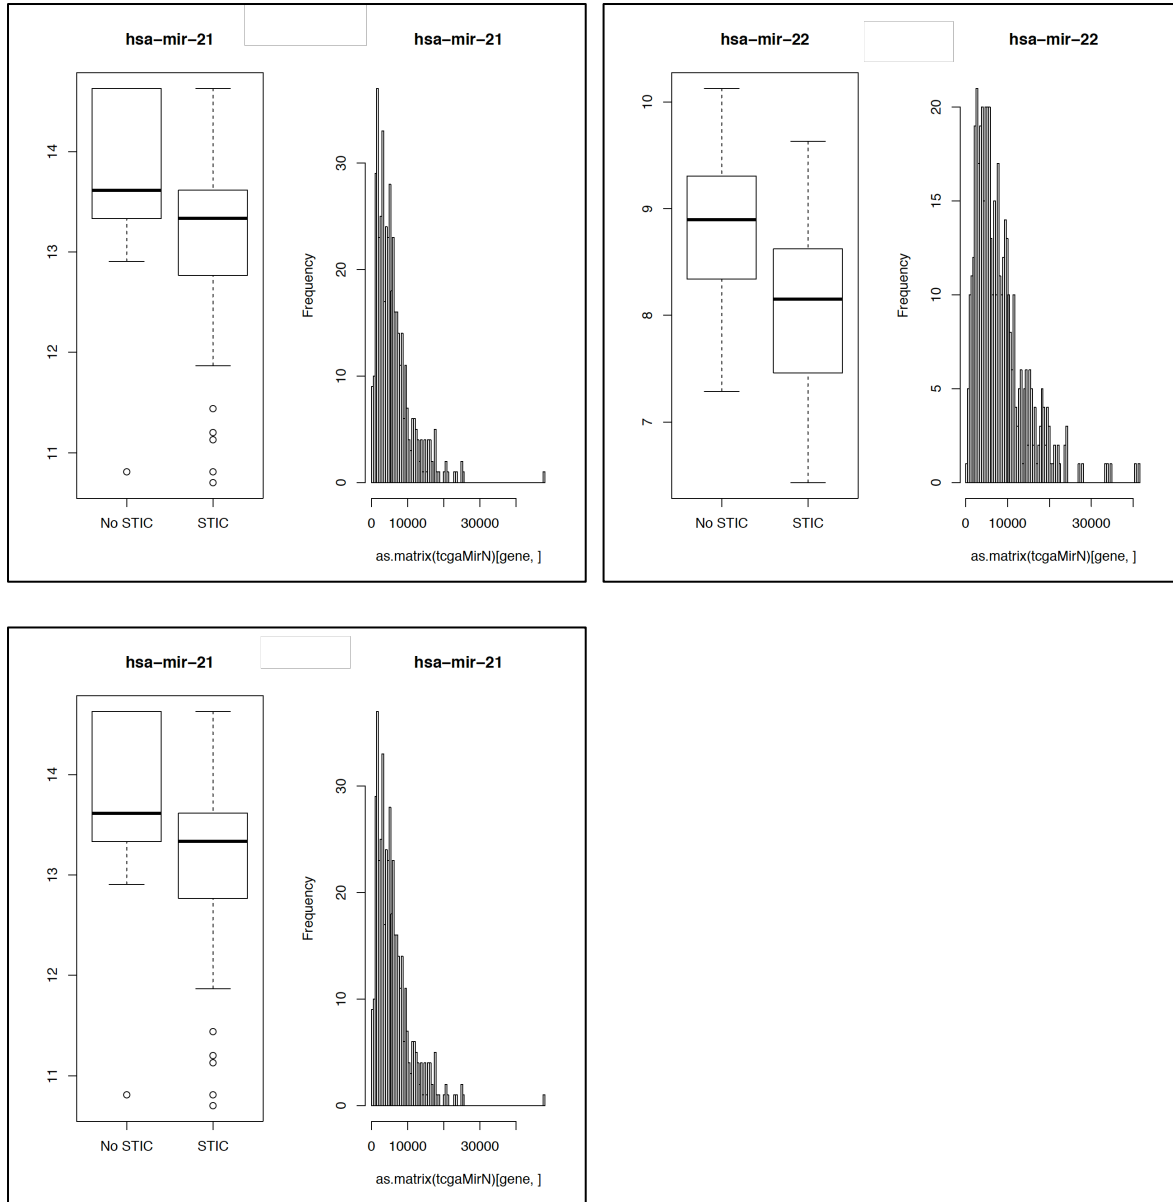

**Supplementary Figure 2.** Expression of microRNAs in this study and TCGA. Each left panel shows the expression of a given microRNA in the current study and in TCGA (right panel). Boxplot center lines represent medians, box limits are the inter-quartile range from 25% and 75%, whiskers represent the extent of tumors out to 1.5 times the inter-quartile range, and circles are outliers beyond 1.5 times the inter-quartile range.

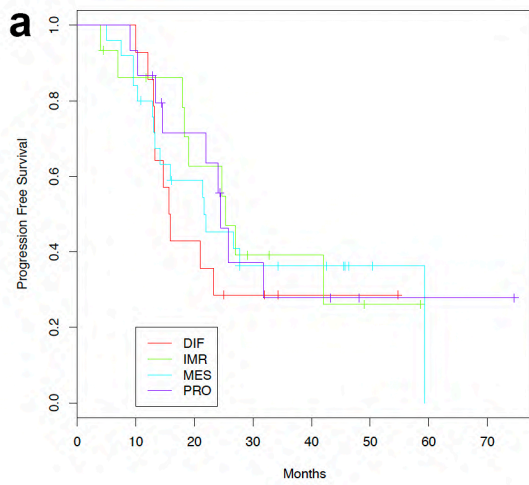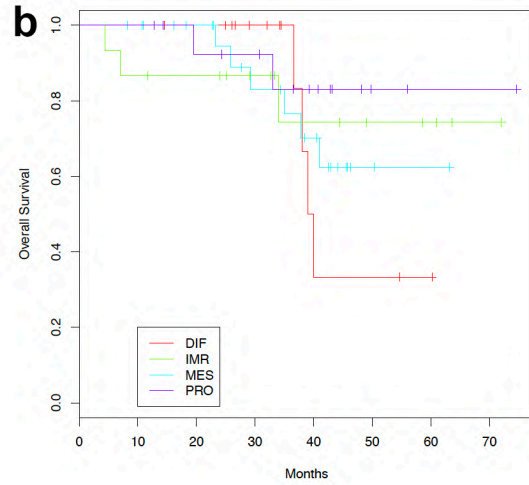

**Supplementary Figure 3.** Clinical outcome by gene expression subtype. Progression-free (a;  $p = 0.81$ , log-rank test) or overall (b;  $p=0.71$ , log-rank test) survival between gene expression subtypes.

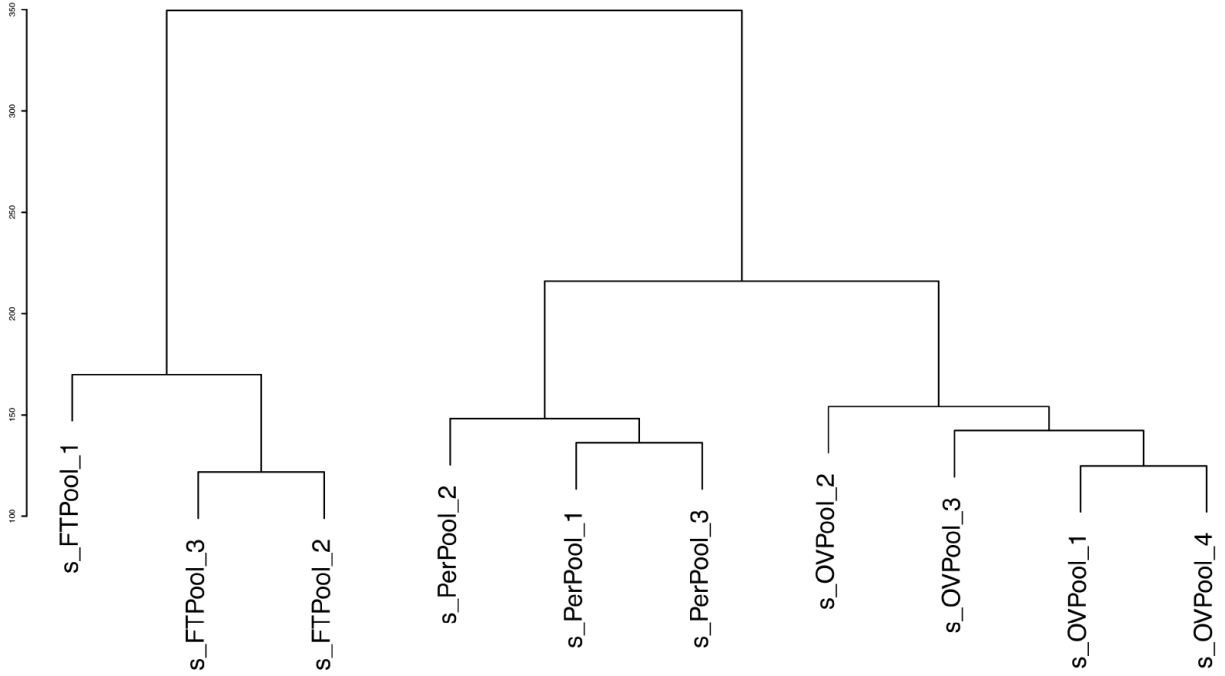

**Supplementary Figure 4.** RNA sequence clustering of normal tissues. Unsupervised hierarchical clustering of RNA sequence data from pooled tissue samples of ovarian surface epithelium (OV), peritoneum (Per), and fallopian tube epithelium (FT).

| Power for Molecular Studies |                                             |                          |
|-----------------------------|---------------------------------------------|--------------------------|
| Effect Size                 | Sample Size                                 |                          |
|                             | Reported as percent detected, with 90% C.I. |                          |
|                             | 40 per group                                | 50 per group             |
| 0.75s.d.                    | 20% (CI: 8% to 34%)                         | 40% (90% CI: 24% to 54%) |
| 1.0s.d.                     | 71% (58%-82%)                               | 88% (80%-94%)            |
| 1.5s.d.                     | 99% (98%-100%)                              | 99.99% (>99%)            |

**Supplementary Table 1.** Power analysis framework for molecular studies.
