# Supplementary material for: Molecular analysis of high-grade serous ovarian carcinoma with and without associated serous tubal intra-epithelial carcinoma
Source: PubMed Central journal article supplement (PMC5645359; doi:10.1038/s41467-017-01217-9), 2017-10-17
Supplement: 41467_2017_1217_MOESM2_ESM.pdf [file 41467_2017_1217_MOESM2_ESM.pdf]

## **Description of Additional Supplementary Files**

File Name: Supplementary Data 1

Description: Detailed demographic, molecular and clinical characteristics of individual patients with high-grade serous carcinomas with and without STIC lesions.

File Name: Supplementary Data 2.

Description: Copy number alterations identified as significantly altered in the GISTIC analysis compared between samples with and without STIC lesions by genomic region.

File Name: Supplementary Data 3.

Description: Copy number alterations identified as significantly altered in the GISTIC analysis compared between samples with and without STIC lesions by gene.

File Name: Supplementary Data 4.

Description: Class comparison of mRNA expression between samples with and without STIC lesions.

File Name: Supplementary Data 5.

Description: Class comparison of microRNA expression between samples with and without STIC lesions.

File Name: Supplementary Data 6.

Description: Differentially expressed genes among normal tissue subtypes.
